# Supplementary material for: Scoping review of HIV-related intersectional stigma among sexual and gender minorities in sub-Saharan Africa
Source: HighWire-hosted journal article supplement (doi:10.1136/bmjopen-2023-078794), 2024-02-01
Supplement: bmjopen-2023-078794supp002_data_supplement.pdf [file bmjopen-2023-078794supp002_data_supplement.pdf]

| Reference                                                                                                                                       | Author     | Year | Sub-Saharan African Country/ies | Setting       | Research Method | Study Design    | Intervention Evaluated | Sample Size of Sexual or Gender Minority | Sexual or Gender Minority Population* | Stigmatized Attribute                            | Socio-ecological Level of Stigma                                                  | HIV Outcomes (Quantitatively Assessed or Qualitatively Described) |                                           |                   |              |                                            | Research Question/Purpose                                                                                                                                            |
|-------------------------------------------------------------------------------------------------------------------------------------------------|------------|------|---------------------------------|---------------|-----------------|-----------------|------------------------|------------------------------------------|---------------------------------------|--------------------------------------------------|-----------------------------------------------------------------------------------|-------------------------------------------------------------------|-------------------------------------------|-------------------|--------------|--------------------------------------------|----------------------------------------------------------------------------------------------------------------------------------------------------------------------|
|                                                                                                                                                 |            |      |                                 |               |                 |                 |                        |                                          |                                       |                                                  |                                                                                   | HIV Status                                                        | Access to HIV prevention or care services | Viral suppression | Condom usage | Transactional sex (provision or patronage) |                                                                                                                                                                      |
| <b>INTERSECTIONAL STIGMA STUDIES</b>                                                                                                            |            |      |                                 |               |                 |                 |                        |                                          |                                       |                                                  |                                                                                   |                                                                   |                                           |                   |              |                                            |                                                                                                                                                                      |
| <a href="https://doi.org/10.3390/ijerph182413103">https://doi.org/10.3390/ijerph182413103</a>                                                   | Abubakari, | 2021 | Ghana                           | Urban         | Qualitative     | Cross-Sectional | Yes                    | 240                                      | MSM                                   | HIV, Same-sex orientation, Gender non-conformity | Individual, Interpersonal, Societal (public policy)                               |                                                                   | X                                         |                   |              |                                            | Aim to evaluate a peer support intervention to address intersectional stigma and improve HIV health-seeking behaviors among MSM in Ghana.                            |
| <a href="https://link.springer.com/chapter/10.1007%2F978-94-007-6324-1_15">https://link.springer.com/chapter/10.1007%2F978-94-007-6324-1_15</a> | Cloete,    | 2013 | South Africa                    | Urban & Rural | Qualitative     | Cross-Sectional | No                     | Unspecified                              | MSM                                   | HIV, Same-sex orientation                        | Individual, Interpersonal, Institutional/Organizational, Societal (public policy) | X                                                                 | X                                         |                   |              |                                            | Aim to examine MSM and HIV/AIDS and the layering of stigmas experienced by HIV positive MSM in South Africa to inform prevention programming and treatment services. |
| <a href="https://onlinelibrary.wiley.com/doi/10.7448/1">https://onlinelibrary.wiley.com/doi/10.7448/1</a>                                       | Kennedy,   | 2013 | Eswatini                        | Urban         | Qualitative     | Cross-Sectional | No                     | 62                                       | MSM                                   | HIV, Same-sex orientation                        | Individual, Interpersonal, Institutional/Organizational, Societal (public policy) | X                                                                 | X                                         |                   | X            | X                                          | Aim to explore the experiences and HIV prevention, care and treatment needs of MSM who are living with HIV in Swaziland using the framework                          |

|                                                                                                                                                                   |          |      |              |               |               |                 |     |             |            |                                                  |                                                                                   |   |   |   |   |   |                                                                                                                                                                                                                                               |
|-------------------------------------------------------------------------------------------------------------------------------------------------------------------|----------|------|--------------|---------------|---------------|-----------------|-----|-------------|------------|--------------------------------------------------|-----------------------------------------------------------------------------------|---|---|---|---|---|-----------------------------------------------------------------------------------------------------------------------------------------------------------------------------------------------------------------------------------------------|
| AS.16.4.18749                                                                                                                                                     |          |      |              |               |               |                 |     |             |            |                                                  |                                                                                   |   |   |   |   |   | of positive health, dignity, and prevention.                                                                                                                                                                                                  |
| <a href="https://link.springer.com/article/10.1007%2Fs10461-012-0328-5">https://link.springer.com/article/10.1007%2Fs10461-012-0328-5</a>                         | Jobson,  | 2013 | South Africa | Other         | Qualitative   | Cross-Sectional | No  | 31          | MSM        | HIV, Same-sex orientation                        | Individual, Institutional/Organizational, Societal (public policy)                |   | X |   | X | X | Aim to examine the social, cultural, and sexual dynamics that influence HIV risk behaviours among MSM and understand the interactions and linkages between risk environments and risk situations to address drivers of HIV risk.              |
| <a href="https://pubmed.ncbi.nlm.nih.gov/35818873/">https://pubmed.ncbi.nlm.nih.gov/35818873/</a>                                                                 | Nyblade, | 2022 | Ghana        | Urban & Rural | Mixed Methods | Cross-Sectional | Yes | Unspecified | MSM        | HIV, Same-sex orientation, Gender non-conformity | Individual, Interpersonal, Institutional/Organizational, Societal (public policy) | X | X |   |   |   | Aim to adapt an intersectional HIV stigma-reduction intervention to address HIV, same-sex and gender non-conformity stigma among healthcare workers in Ghana.                                                                                 |
| <a href="https://www.ncbi.nlm.nih.gov/pmc/articles/PMC7880051/">https://www.ncbi.nlm.nih.gov/pmc/articles/PMC7880051/</a>                                         | Lyons,   | 2020 | Senegal      | Urban         | Quantitative  | Longitudinal    | Yes | 182         | MSM, Other | HIV, Same-sex orientation                        | Individual, Interpersonal, Institutional/Organizational                           | X | X | X |   |   | Aim to assess longitudinal differences in stigma and HIV outcomes among key populations at risk for and living with HIV, and to characterize the relationship between stigma and HIV prevention and treatment through an intersectional lens. |
| <a href="https://journals.plos.org/plosone/article?id=10.1371/journal.pone.0115504">https://journals.plos.org/plosone/article?id=10.1371/journal.pone.0115504</a> | Nelson,  | 2015 | Ghana        | Urban         | Quantitative  | Cross-Sectional | No  | 137         | MSM        | HIV, Gender non-conformity                       | Individual, Interpersonal, Institutional/Organizational                           | X |   | X | X |   | Aim to examine whether psychosocial variables (stigma) theorized to influence HIV/STI sexual risk behaviors differ between peer social networks in a sample of Ghanaian MSM and to what degree these variables predict condom use.            |

## PARTIALLY INTERSECTIONAL STIGMA STUDIES

|                                                                                                                                 |            |      |         |        |               |                 |     |     |     |                                                           |                                                                                   |   |   |  |   |   |                                                                                                                                                                                                         |
|---------------------------------------------------------------------------------------------------------------------------------|------------|------|---------|--------|---------------|-----------------|-----|-----|-----|-----------------------------------------------------------|-----------------------------------------------------------------------------------|---|---|--|---|---|---------------------------------------------------------------------------------------------------------------------------------------------------------------------------------------------------------|
| <a href="https://academic.oup.com/heapol/article/37/5/587/6527050">https://academic.oup.com/heapol/article/37/5/587/6527050</a> | Ndione,    | 2022 | Senegal | Urban  | Qualitative   | Cross-Sectional | No  | 10  | MSM | HIV, Same-sex orientation                                 | Individual, Interpersonal, Institutional/Organizational                           | X | X |  |   |   | Aim to describe the perceptions involved in the care relationship between MSM, medical and non-medical staff, and to document the effect of stigma on access and quality of healthcare received by MSM. |
| <a href="https://doi.org/10.1080/13691058.2019.1582802">https://doi.org/10.1080/13691058.2019.1582802</a>                       | Balogun,   | 2020 | Nigeria | Urban  | Qualitative   | Cross-Sectional | No  | 21  | MSM | HIV, Same-sex orientation                                 | Individual, Institutional/Organizational, Societal (public policy)                | X | X |  |   |   | Aim to understand the barriers care access to MSM with HIV in Nigeria.                                                                                                                                  |
| <a href="https://dx.doi.org/10.1080/17441692.2020.1832555">https://dx.doi.org/10.1080/17441692.2020.1832555</a>                 | Abubakari, | 2021 | Ghana   | Urban  | Mixed Methods | Cross-Sectional | Yes | 57  | MSM | HIV, Same-sex orientation, Gender non-conformity          | Individual, Interpersonal, Institutional/Organizational, Societal (public policy) | X | X |  | X |   | Aim to evaluate the acceptability and feasibility of a stigma reduction intervention for HIV prevention.                                                                                                |
| <a href="https://www.ncbi.nlm.nih.gov/pmc/articles/PMC8716065/">https://www.ncbi.nlm.nih.gov/pmc/articles/PMC8716065/</a>       | Mujugira,  | 2021 | Uganda  | Unkown | Mixed Methods | Cross-Sectional | No  | 50  | TGM | HIV, Same-sex orientation, Transgender identity, Sex work | Individual, Interpersonal, Societal (public policy)                               | X | X |  |   | X | Aim to characterize HIV and STI risk, prevention needs and sexual decision making among trans men in Uganda.                                                                                            |
| <a href="https://www.ncbi.nlm.nih.gov/pmc/articles/PMC5627492/">https://www.ncbi.nlm.nih.gov/pmc/articles/PMC5627492/</a>       | Kushwaha,  | 2017 | Ghana   | Urban  | Qualitative   | Cross-Sectional | No  | 152 | MSM | HIV, Same-sex orientation                                 | Individual, Interpersonal, Institutional/Organizational                           | X | X |  | X |   | Aim to investigate MSM's experiences using HIV prevention resources, factors influencing their use, and self-identified strategies for improving HIV/STI prevention                                     |

|                                                                                                                                                                     |                 |      |              |       |               |                 |    |     |            |                                                  |                                                                                   |   |   |  |  |  |                                                                                                                                                                                                      |
|---------------------------------------------------------------------------------------------------------------------------------------------------------------------|-----------------|------|--------------|-------|---------------|-----------------|----|-----|------------|--------------------------------------------------|-----------------------------------------------------------------------------------|---|---|--|--|--|------------------------------------------------------------------------------------------------------------------------------------------------------------------------------------------------------|
|                                                                                                                                                                     |                 |      |              |       |               |                 |    |     |            |                                                  |                                                                                   |   |   |  |  |  | among MSM in Ghanaian communities.                                                                                                                                                                   |
| <a href="https://bmcpubhealth.biomedcentral.com/articles/10.1186/s12889-020-09942-5">https://bmcpubhealth.biomedcentral.com/articles/10.1186/s12889-020-09942-5</a> | deVilliers,     | 2020 | South Africa | Urban | Qualitative   | Longitudinal    | No | 8   | TGW, Other | HIV, Same-sex orientation, Transgender identity  | Individual, Societal (public policy)                                              | X | X |  |  |  | Aim to understand how stigma affects HIV service access among transfeminine and gender diverse women in South Africa.                                                                                |
| <a href="https://dx.doi.org/10.1177/2325958220978113">https://dx.doi.org/10.1177/2325958220978113</a>                                                               | Gu,             | 2021 | Ghana        | Urban | Qualitative   | Cross-Sectional | No | 225 | MSM        | HIV, Same-sex orientation, Gender non-conformity | Individual, Interpersonal, Institutional/Organizational, Societal (public policy) |   | X |  |  |  | Aim to investigate how HIV-related stigmas, same-sex behavior stigma, gender nonconformity stigma, and autonomy-supportive healthcare climate influence linkage to care among MSM with HIV in Ghana. |
| <a href="https://doi.org/10.1057/jph.2011.29">https://doi.org/10.1057/jph.2011.29</a>                                                                               | Rispel,         | 2011 | South Africa | Urban | Mixed Methods | Cross-Sectional | No | 152 | MSM        | HIV, Same-sex orientation                        | Individual, Interpersonal, Institutional/Organizational, Societal (public policy) |   | X |  |  |  | Aim to understand the availability and utilization of HIV programs and health services by MSM in South Africa                                                                                        |
| <a href="http://dx.doi.org/10.1037/sah0000319">http://dx.doi.org/10.1037/sah0000319</a>                                                                             | Rodriguez-Hart, | 2021 | Nigeria      | Urban | Mixed Methods | Cross-Sectional | No | 24  | MSM, Other | Same-sex orientation, Gender non-conformity      | Individual, Interpersonal, Institutional/Organizational, Societal (public policy) | X |   |  |  |  | Aim to characterize mental health coping strategies as important mediators of the relationship between sexual/gender minority stigma and HIV outcomes in Nigeria.                                    |
| <a href="https://www.tandfonline.com/doi/ful">https://www.tandfonline.com/doi/ful</a>                                                                               | Stahlman,       | 2015 | Lesotho      | Urban | Qualitative   | Cross-Sectional | No | 29  | MSM        | HIV, Same-sex orientation,                       | Individual, Interpersonal, Institutional/Organizational,                          |   | X |  |  |  | Aim to describe the adverse health and social consequences of sexual stigma, the positive influences of social capital                                                                               |

|                                                                                                               |           |      |                                      |               |              |                 |    |      |                           |                                                  |                                                                                   |   |   |  |   |   |                                                                                                                                                                                                                                                                 |
|---------------------------------------------------------------------------------------------------------------|-----------|------|--------------------------------------|---------------|--------------|-----------------|----|------|---------------------------|--------------------------------------------------|-----------------------------------------------------------------------------------|---|---|--|---|---|-----------------------------------------------------------------------------------------------------------------------------------------------------------------------------------------------------------------------------------------------------------------|
| I/10.1016/j.rhm.2015.11.017                                                                                   |           |      |                                      |               |              |                 |    |      |                           | Gender non-conformity                            | Societal (public policy)                                                          |   |   |  |   |   | (i.e., social support), and the role of identity disclosure in the lives of MSM in Lesotho.                                                                                                                                                                     |
| <a href="https://dx.doi.org/10.1371/journal.pone.0147714">https://dx.doi.org/10.1371/journal.pone.0147714</a> | Wanyenze, | 2016 | Uganda                               | Urban & Rural | Qualitative  | Cross-Sectional | No | 85   | MSM                       | HIV, Same-sex orientation, Gender non-conformity | Individual, Interpersonal, Institutional/Organizational, Societal (public policy) |   | X |  | X |   | Aim to explore the barriers and opportunities for increasing access to HIV services among MSM in Uganda.                                                                                                                                                        |
| <a href="https://dx.doi.org/10.7448/IAS.19.3.20774">https://dx.doi.org/10.7448/IAS.19.3.20774</a>             | Stahlman, | 2016 | Côte d'Ivoire, Togo and Burkina Faso | Urban         | Quantitative | Cross-Sectional | No | 2456 | MSM, TGW                  | Same-sex orientation, Transgender identity       | Individual, Interpersonal                                                         | X |   |  | X | X | Aim to explore how HIV risk factors could potentially mediate the association between sexual behavior stigma and HIV infection among TGW as compared with MSM while using an intercategory approach to assess the intersectionality of sexual behaviour stigma. |
| <a href="https://dx.doi.org/10.1007/s10461-020-02917-y">https://dx.doi.org/10.1007/s10461-020-02917-y</a>     | Logie,    | 2020 | Lesotho                              | Urban         | Qualitative  | Cross-Sectional | No | 46   | MSM, WSW, TGM, TGW, Other | HIV, Same-sex orientation, Gender non-conformity | Individual, Interpersonal, Institutional/Organizational, Societal (public policy) | X | X |  | X |   | Aim to examine the socio-cultural mechanisms that link LGBT stigma, depression, substance use, and HIV among the LGBT community in Lesotho.                                                                                                                     |
| <a href="https://doi.org/10.1080/17441692.2021.1987500">https://doi.org/10.1080/17441692.2021.1987500</a>     | Bourne,   | 2021 | Kenya                                | Urban         | Qualitative  | Cross-Sectional | No | 30   | MSM                       | Same-sex orientation, Gender non-conformity      | Interpersonal, Institutional/Organizational, Societal (public policy)             | X | X |  |   |   | Aim to examine the current engagement with sexual health services, including HIV/STI testing and treatment among MSM in Kenya.                                                                                                                                  |

*\*Other = Unspecified or other sexual and/or gender minorities*
